# Supplementary material for: A redox-responsive NIR fluorescent nanoprobe for tumor microenvironment-activated surgical navigation with submillimeter precision
Source: Royal Society of Chemistry journal article supplement (doi:10.1039/d5tb01157d), 2025-01-01
Supplement: d5tb01157d1.pdf [file d5tb01157d1.pdf]

## Supplementary Information

### Redox-Responsive NIR Fluorescent Nanoprobe for Tumor Microenvironment-Activated Surgical Navigation with Submillimeter Precision

Jian Sun,<sup>a</sup> Jintao Ye,<sup>a,b</sup> Wenwei Tang,<sup>a</sup> Bin Yu,<sup>a</sup> Yong Gao,<sup>a</sup> Shengli Wang,<sup>a</sup> Haijuan Zhang<sup>\*a</sup>

<sup>a</sup>School of Mathematics, Physics and Statistics, Shanghai Polytechnic University, Shanghai 201209, P. R. China

<sup>b</sup>School of Resources and Environmental Engineering, Shanghai Polytechnic University, Shanghai 201209, P. R. China

\*E-mail: [zhanghj@sspu.edu.cn](mailto:zhanghj@sspu.edu.cn)

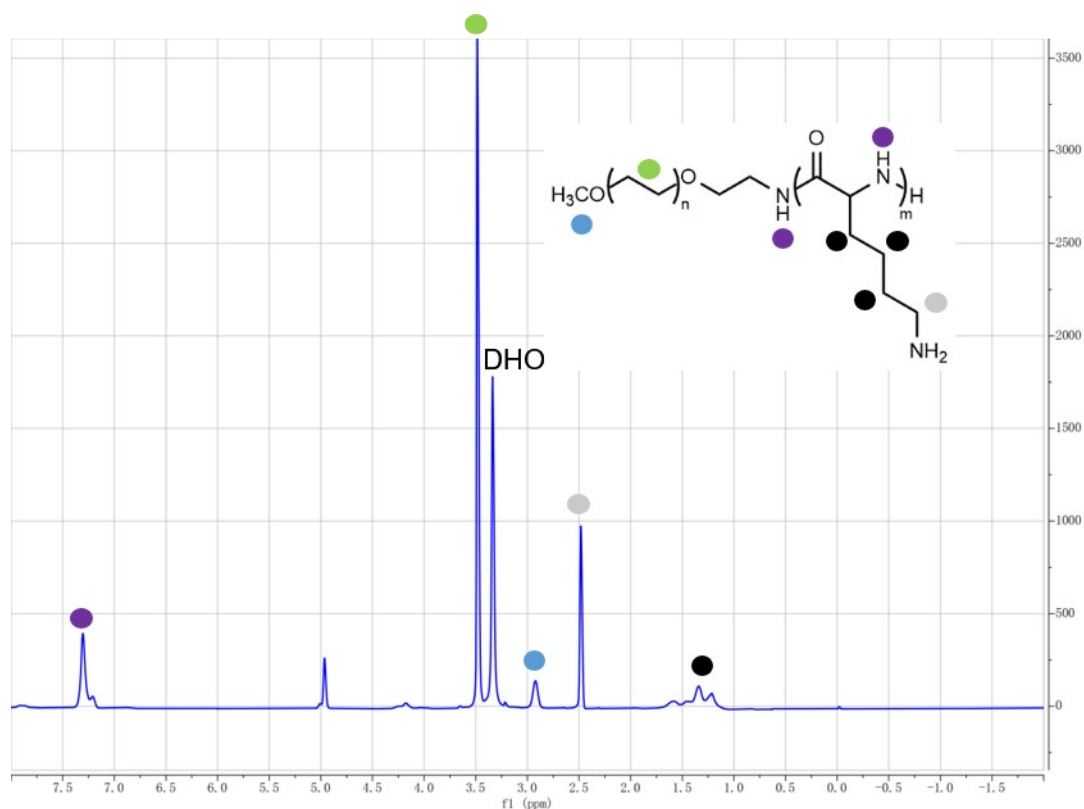

Fig. S1 <sup>1</sup>H NMR Spectrum of PEG-pLys.

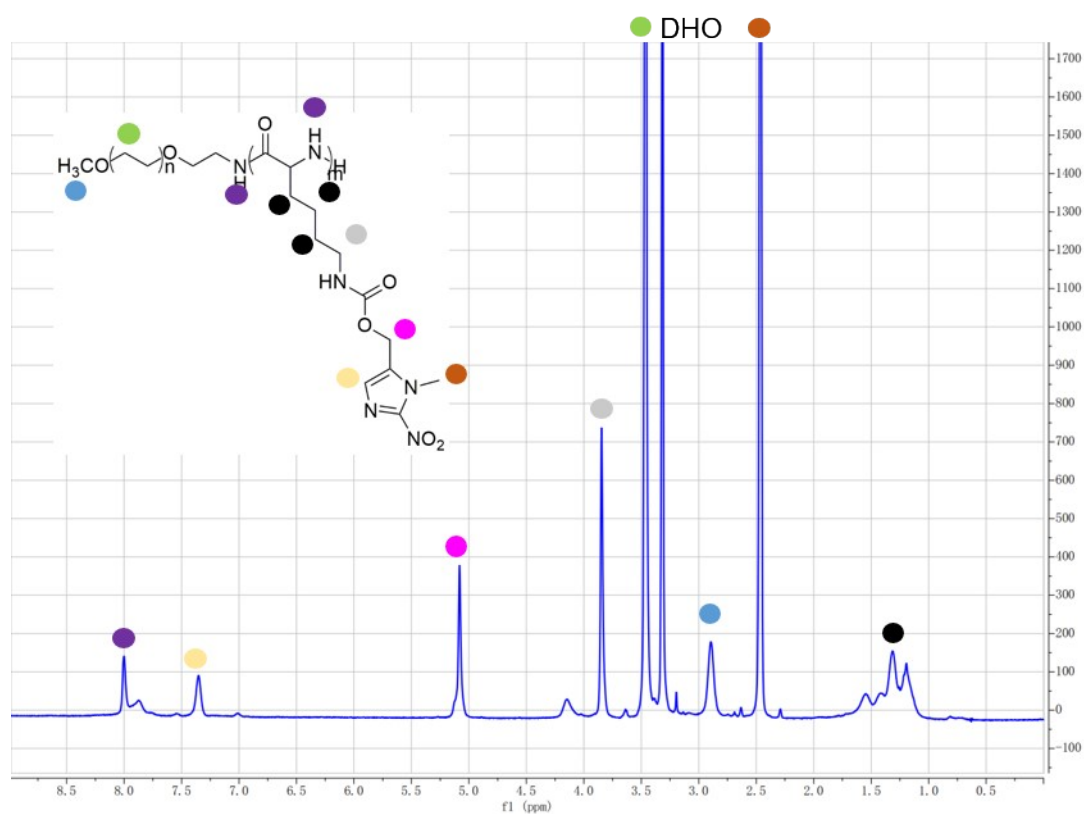

Fig. S2  $^1\text{H}$  NMR Spectrum of PEG-NI.

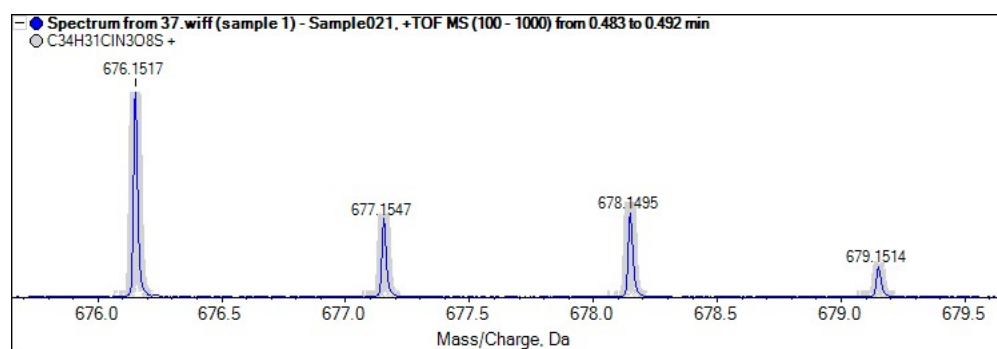

Fig. S3 High resolution mass spectrometer of DNS-DYE.

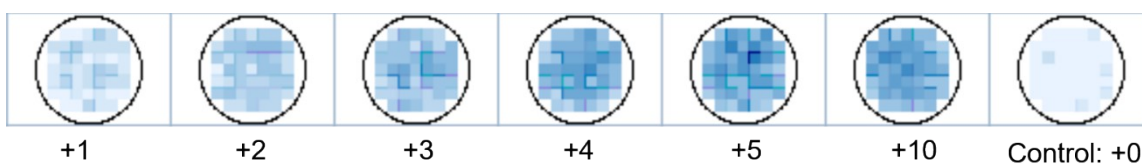

**Fig. S4** Fluorescence response of the nanoprobe to varying numbers of MDA-MB-231 cells. The near-infrared probe (1 mM) was pre-added to cell culture dishes and incubated with 1, 2, 3, 4, 5, and  $10 \times 10^4$  MDA-MB-231 cells at 37 °C for 12 h. Fluorescence intensity was measured using a microplate reader.

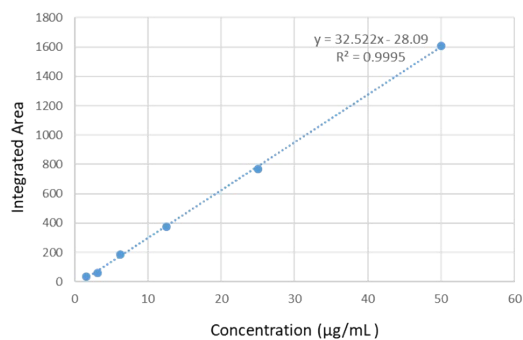

**Fig. S5** The standard curve of DNS-DYE using HPLC (with UV detector).
